# Supplementary material for: Discovering privileged topologies of molecular knots with self-assembling models
Source: PubMed Central journal article supplement (PMC6076300; doi:10.1038/s41467-018-05413-z), 2018-08-03
Supplement: 41467_2018_5413_MOESM1_ESM.pdf [file 41467_2018_5413_MOESM1_ESM.pdf]

**Supplementary Information**  
**Discovering privileged topologies of molecular knots with self-assembling models**

M. Marena *et al.*

## Supplementary Note 1. Topological state diagrams

### 3 TEMPLATES - Same Chirality

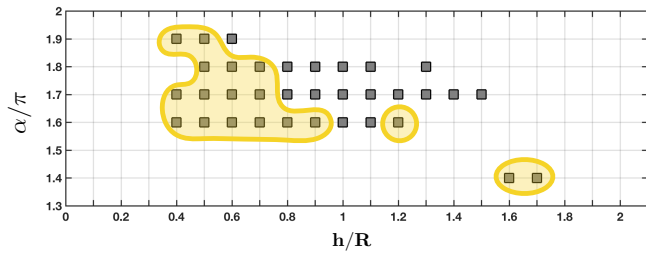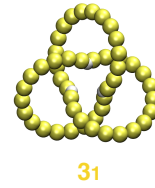

### 4 TEMPLATES - Same Chirality

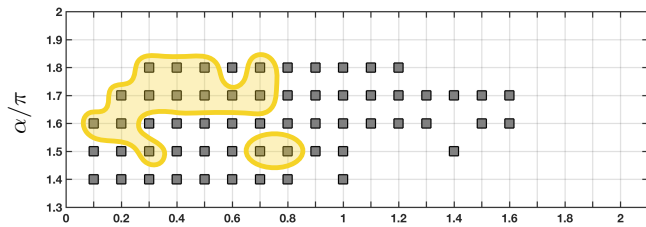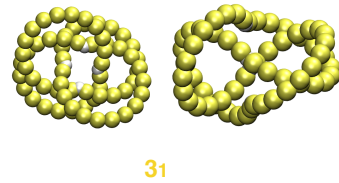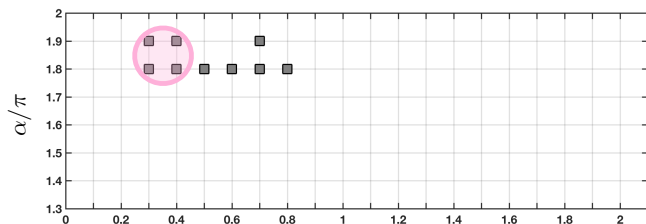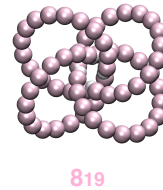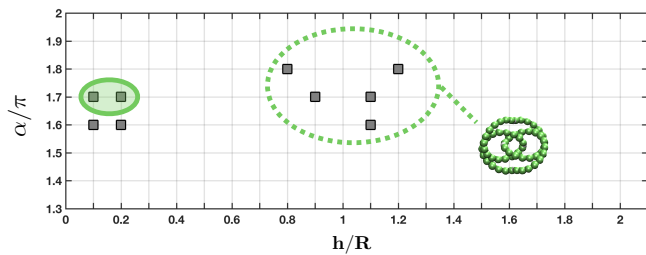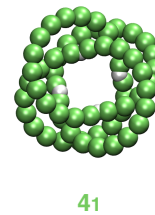

**Supplementary Figure 1:** Topological state diagram. The highlighted points in the discretized  $(h, \alpha)$  parameter space mark the template shapes where one observes constructs  $n_T = 3$  (top) and  $n_T = 4$  (bottom) templates with the topologies sketched on the right. The highlighted regions include points where the indicated knots account for more than 1% of the MC-sampled constructs. The cases shown here are made of templates with the same chirality. The  $4_1$ -knotted instances in the bottom panel mostly correspond to the geometry shown on the right, but there are also instances of an alternative geometry, shown inside the topological state diagram.

## 4 TEMPLATES - Racemic Mixture

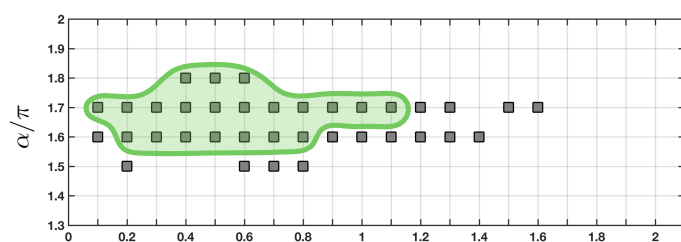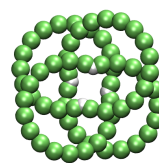

41

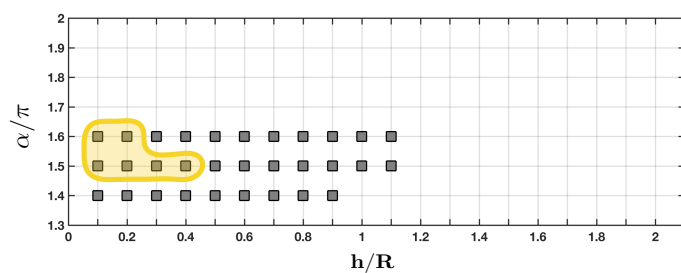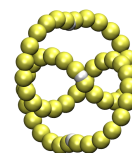

31

## 5 TEMPLATES - Same Chirality

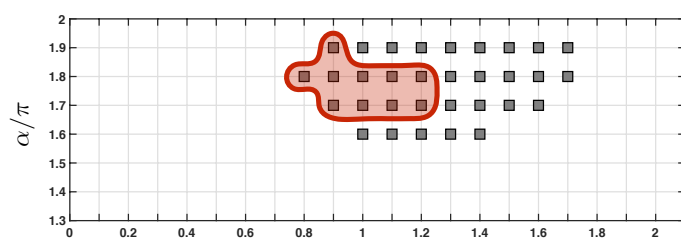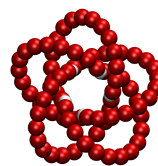

10124

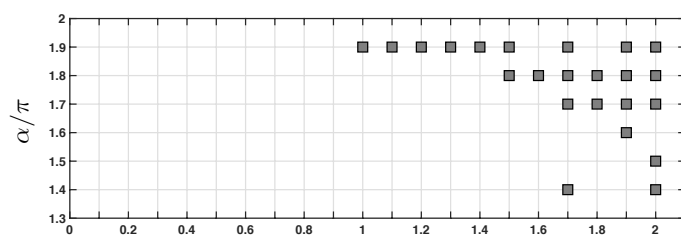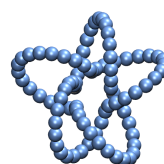

51

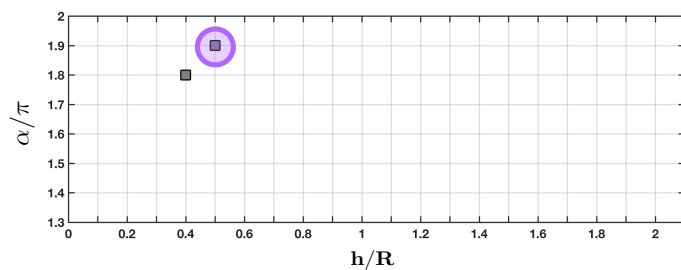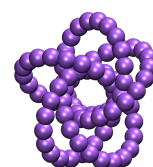

15n41185

**Supplementary Figure 2:** Topological state diagram. The highlighted points in the discretized  $(h, \alpha)$  parameter space mark the template shapes where one observes constructs  $n_T = 4$  (top, racemic template mixture) and  $n_T = 5$  (bottom, templates of same chirality) templates with the topologies sketched on the right. The highlighted regions includes points where the indicated knots account for more than 1% of the MC-sampled constructs.

## Supplementary Note 2. Designability score of constructs obtained with self-assembly simulations

|                            | 3 templates |          |         | 4 templates |            |               | 5 templates |  |  |
|----------------------------|-------------|----------|---------|-------------|------------|---------------|-------------|--|--|
| <b>Topology</b>            | $3_1$       | $8_{19}$ | $4_1^*$ | $3_1$       | $10_{124}$ | $15n_{41185}$ | $12n_{242}$ |  |  |
| <b>Designability Score</b> | 42          | 24       | 20      | 55          | 11         | 5             | 9           |  |  |

**Supplementary Table I:** Designability score for the symmetric (and quasi-symmetric) knots obtained in self-assembly of 3, 4 and 5 templates with shape parameters ( $h \in [0.1, 2.0]$  and  $\alpha \in [1.4, 1.9]\pi$ ).

(\*) The  $4_1$  is assembled from a racemic combination of 2 left- and 2 right-handed templates.

## Supplementary Note 3. Self-assembly in mixtures of hundreds of templates

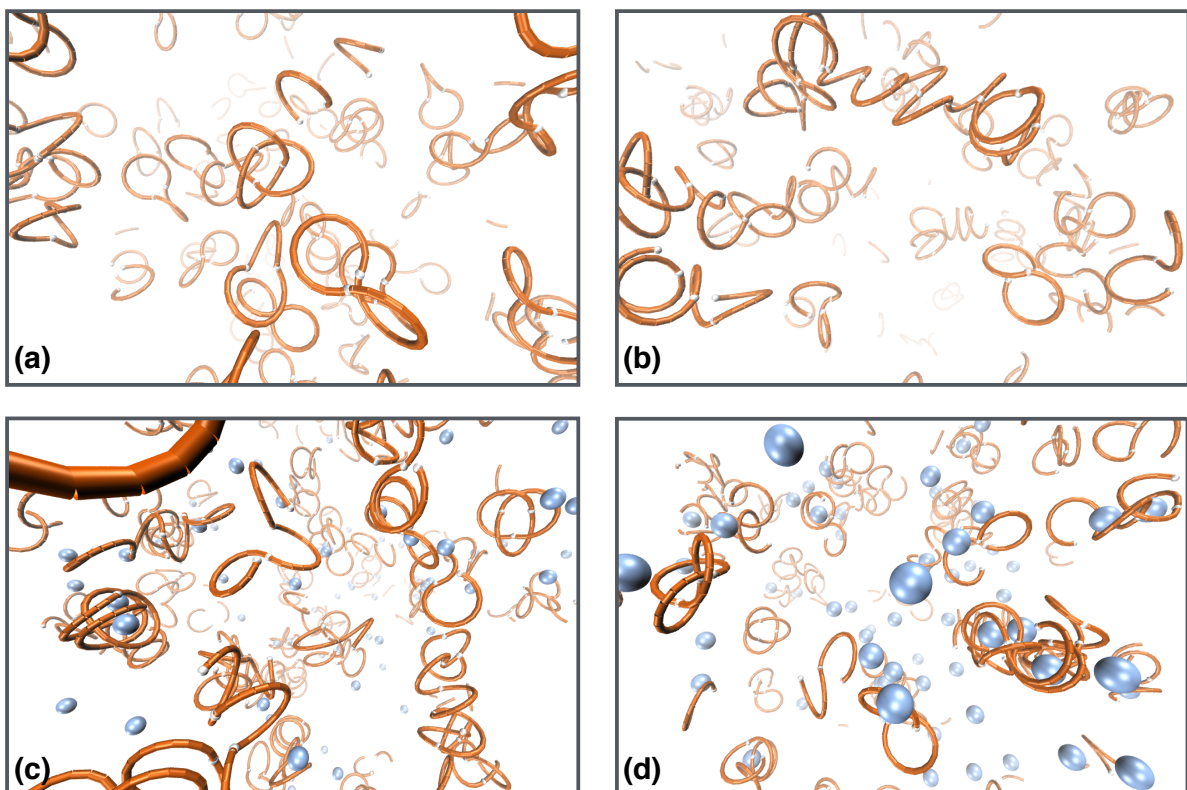

**Supplementary Figure 3:** Snapshots of molecular dynamics simulations for the self-assembly of 250 templates in various conditions. Self-assembly of templates without coordinating particles: (a) same chirality helical fragments with geometry  $h = 1.0$  and  $\alpha = 1.8\pi$  and helical fragments density 0.0125; (b) racemic mixture of helical fragments (ratio 50%) with geometry  $h = 0.8$  and  $\alpha = 1.7\pi$  and helical fragments density 0.0075. Self-assembly of templates with coordinating particles: (c) racemic mixture of helical fragments (ratio 50%) with geometry  $h = 0.8$  and  $\alpha = 1.7\pi$ , helical fragments density 0.0125 and Yukawa parameters  $C_Y = 10$  and  $l_Y = 0.91\sigma$ . The diameter of the coordinating particles in this example is  $2\sigma$ , that is twice the size of the templates' beads. (d) Racemic mixture of helical fragments (ratio 50%) with geometry  $h = 0.8$  and  $\alpha = 1.7\pi$  and helical fragments density 0.0125; coordinating particles diameter  $3\sigma$ , Yukawa parameters  $C_Y = 5$  and  $l_Y = 1.59\sigma$ . For cases (c) and (d), the reference "contact distance" was suitably changed from the  $2^{1/6}\sigma$  value in eq. (1) of the main text, which is appropriate only for the default case of equally-sized template beads and coordinating particles. Other parameters are set to their default values given in the Methods section of the main text.

### Supplementary Note 4. Contact angles in $5_1$ -knotted constructs

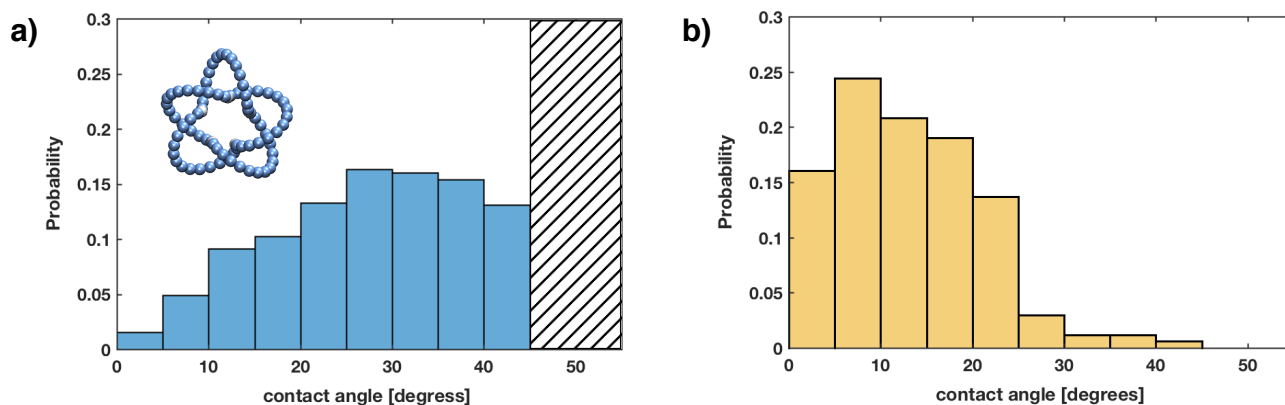

**Supplementary Figure 4:** (a) Probability distribution of the contact angle between consecutive templates in the Monte Carlo-generated cyclic-symmetric  $5_1$  knots made of 5 templates (data cumulated over all explored template shapes). Note that angles larger than  $\pi/4$ , or 45 degrees are disallowed and hence are not populated. The analogous distribution, but pertaining to molecular dynamics simulations, are shown in panel (b). In this case, the shape of the distribution is controlled by the steric and patchy interactions of the templates which promote the collinearity of the contacting templates' ends. Because of these smaller contacting angles, which are much lower than needed to establish  $5_1$  knots - see panel (a)- , the formation of  $5_1$  knots in MD assembly simulations is suppressed.

## Supplementary Note 5. Monte Carlo cyclic-symmetry score

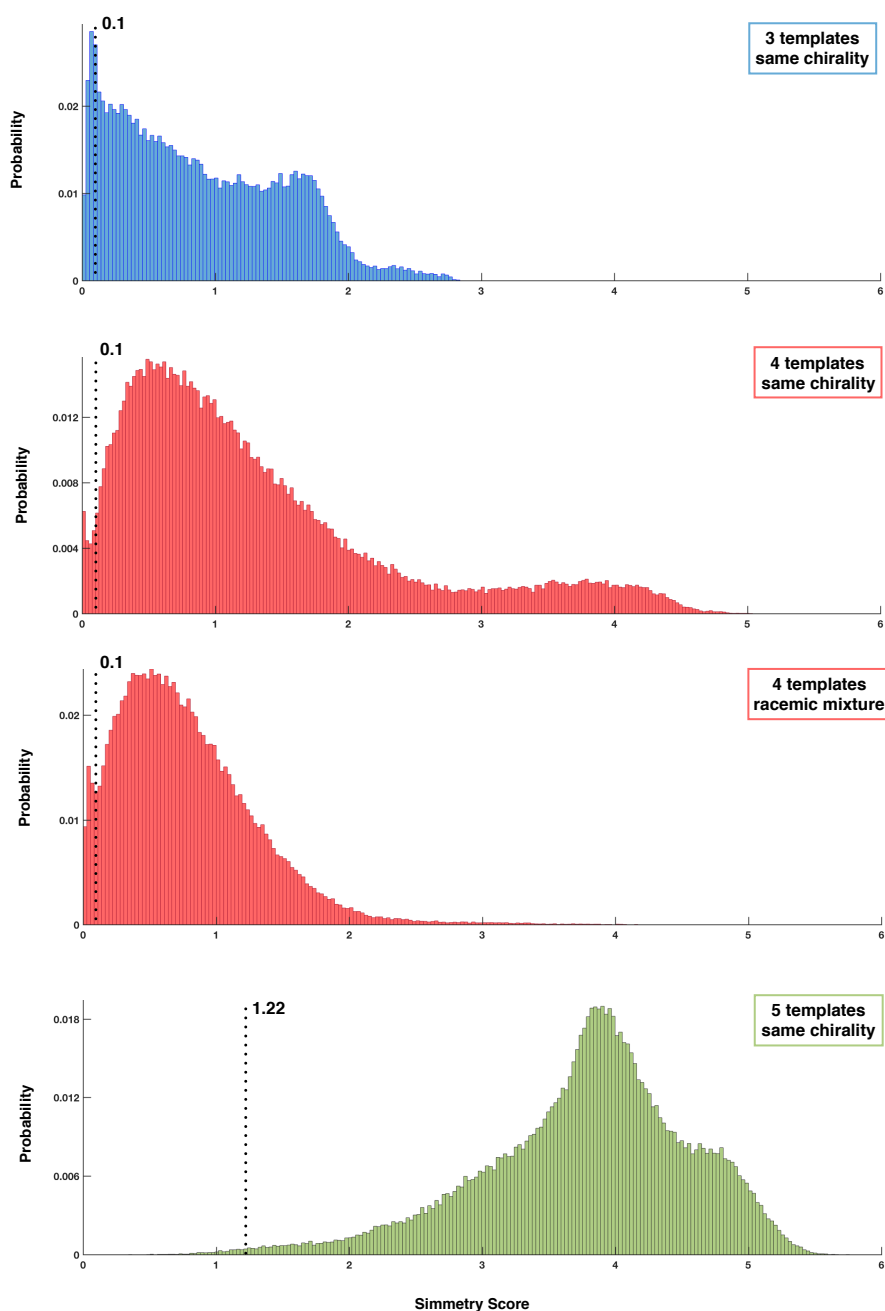

**Supplementary Figure 5:** Probability distribution of the cyclic-symmetry score for Monte-Carlo sampled constructs made of  $n_T = 3, 4,$  and  $5$  templates of same or different chiralities, as indicated. Each distribution is cumulated over all considered templates' shapes. The symmetry score is computed as the root mean square deviation (RMSD) of the structural alignment of a construct with its circular permutant with the best (Kabsch) structural alignment. The best alignment is searched over all cyclic permutations of the beads indices with an indexing shift at least equal to half the templates' length (number of beads). For three and four templates, the presence of cyclic-symmetric constructs is signalled by a peak or shoulder at low values of the score. The cutoff value for the score used to select such instances is marked with a dashed line. For five templates, no peak is discernible and therefore we took the RMSD cutoff value (again indicated with a dashed line) as the largest RMSD below which all constructs are cyclic-symmetric. By this we mean that their geometry can be regularised into a cyclic-symmetric shape with only minor adjustments.

## Supplementary Note 6. Effective bonding potential

The nominal strength of the bonding potential is controlled by the adimensional parameter  $C_p$ . In our simulations we set  $C_p = 25$ , so that the depth of the Gaussian well between two patches is equal to  $25 K_B T$ . The effective unbonding barrier is appreciably smaller than this, as it is clarified by computing the effective free-energy profile,  $F(r)$ , of two patchy particles as a function of their distance  $r$ ,

$$F(r) = -K_B T \log(Z(r)) \quad (1)$$

where  $Z(r)$  is the canonical partition function integrated over the degrees of freedom,  $\{\theta, \phi, \theta', \phi'\}$  defining the relative orientation of the patchy particles at the given distance  $r$ . Apart from a prefactor, contributing only to an additive shift of  $F(r)$ ,  $Z(r)$  is given by:

$$Z(r) = \left(\frac{r}{\sigma}\right)^2 \int_{\cos \theta = -1}^{\cos \theta = +1} \int_{\phi = 0}^{\phi = 2\pi} \int_{\cos \theta' = -1}^{\cos \theta' = +1} \int_{\phi' = 0}^{\phi' = 2\pi} d \cos(\theta) d \cos(\theta') d\phi d\phi' e^{-[U^{patchy}(r) + U^{LJ}(r, \theta, \phi, \theta', \phi')]/K_B T} \quad (2)$$

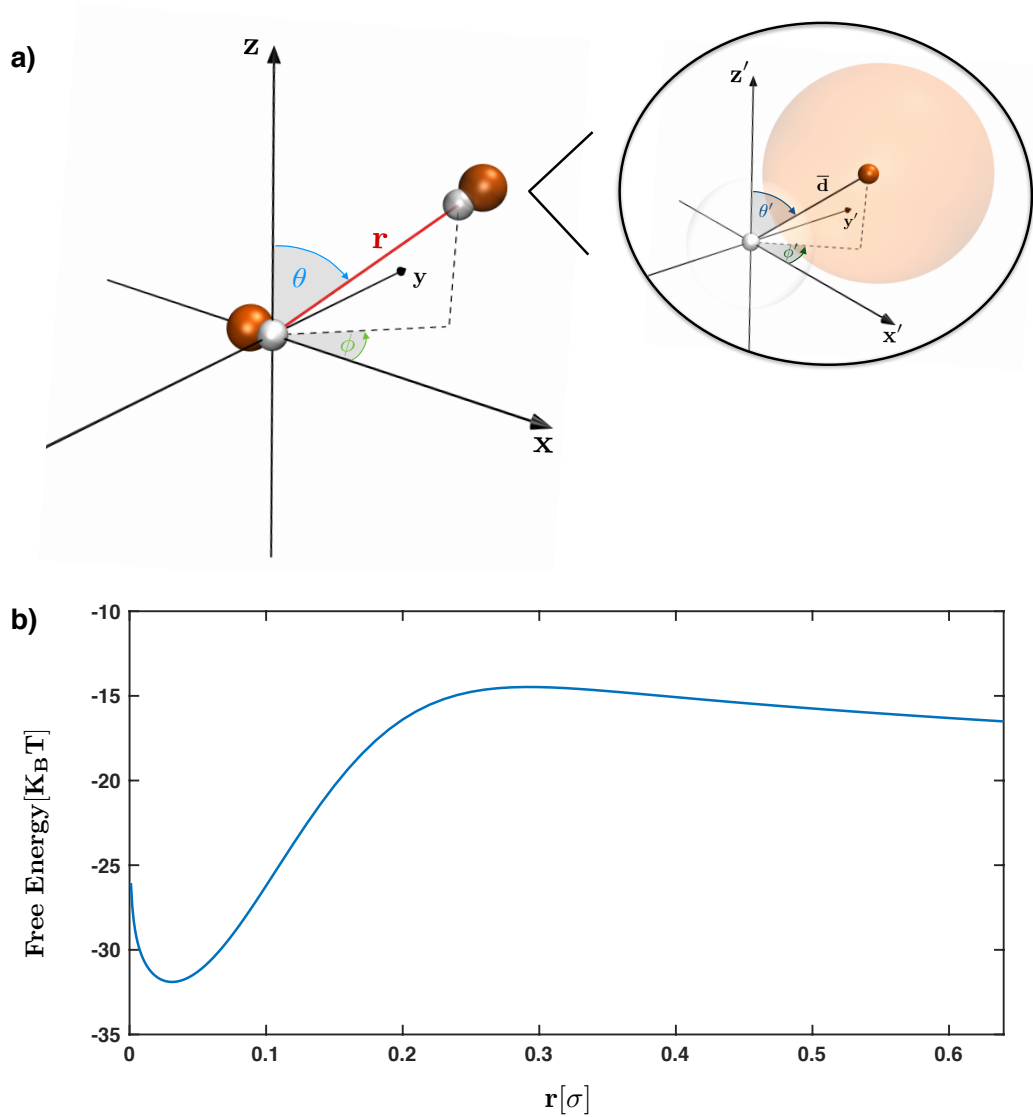

**Supplementary Figure 6:** (a) Representation of the degrees of freedom  $(\theta, \phi, \theta', \phi')$  defining the relative orientation of two patchy particles at a distance  $r$ . (b) Free-energy profile,  $F(r)$ , obtained by numerical integration for  $C_p = 25$ .

where  $\theta$  and  $\phi$  are the radial and azimuthal angles of the second patch defined in the Cartesian frame centered in the first patch and with  $x$  axis oriented along the principal axis of the first patchy particle itself, see Fig. 6a. The other parameters,  $\theta'$  and  $\phi'$  are instead the radial and azimuthal angles that specify the orientation of the center of the second patchy particle in respect to its patch, see inset of Fig. 6a.

The bead-patch distance is fixed and equal to  $\bar{d} = 2^{1/6}\sigma/2$ .

Numerical integration of  $Z(r)$  yields (up to an additive constant) the free energy profile shown in Fig. 6b.

One sees that due to the interplay of entropic and enthalpic effects, the effective barrier for breaking a bond is smaller than  $25 K_B T$ , and specifically it is equal to about  $18 K_B T$ .

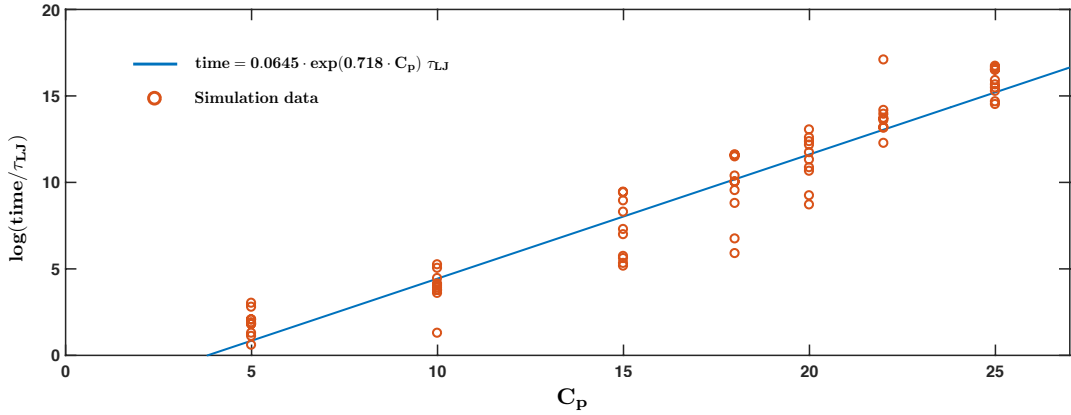

**Supplementary Figure 7:** Natural logarithm of the time required to break the bond between two patchy helical templates as a function of the strength of the patch-patch potential  $C_p$ . Results from simulations are represented with orange circles, while linear fit is represented with a continuous blue line:  $\text{time} = 0.0645 \cdot \exp(0.718 \cdot C_p) \tau_{LJ}$ .

The result is consistent with the actual bond-breaking kinetics for two patchy helical templates, as it is shown in Fig. 7. The semi-log plot shows the  $C_p$  dependence of the time required to break the bond between two initially-contacting templates during various MD simulations (ten per each  $C_p$  value). The best fit line in Fig. 7 is  $\text{time} \propto \exp(0.718 \cdot C_p) \tau_{LJ}$ . For  $C_p = 25$ , this yields the effective barrier  $0.178 \cdot 25 K_B T \sim 18 K_B T$ . The associated detached time is of the order of 4,000,000  $\tau_{LJ}$ , which is about 20 times larger than the typical duration of our production runs.



## Supplementary Note 7. Enumeration of braid patterns

The tables below list various single-component knots (i.e. not links) obtainable for various  $(n_T, n_S)$  combinations, including few beyond those covered by Fig. 4 of the main text, e.g.  $(9, 2)$ ,  $(8, 3)$  and  $(10, 3)$ . The  $(7, 4)$  pair is not included, due to the excessively large number of braid combinations yielding knotted patterns that exceed the complexity of tabulated knot types (available for prime components of up to 16 crossings). Knots of up to 10 crossings are denoted with the conventional Rolfsen notation. More complex knots are labelled with the Thistlethwaite notation, except for specific instances of torus knots, for which we use the conventional  $T(n_1, n_2)$  notation, and very complex topologies which we fingerprint with their Dowker code.

For each  $(n_T, n_S)$  combination, the  $2^{n_T(n_S-1)}$  possible braid patterns are subdivided according to several criteria. First we consider the number of crossings projected in the plane orthogonal to the axis of cyclic symmetry, which is clearly an upper bound to the minimal crossing number. Next, we separate braids that admit a closed cyclic-symmetric arrangement from those that do not. The latter are not the main focus of the study and hence, for simplicity, are not included for the more complex cases of  $(8, 3)$  and  $(10, 3)$ . The symmetric braids are then grouped by the order of their cyclic symmetry. The number of linear braid patterns associated to a given knot type is shown in the second column.

| $(n_T = 3, n_S = 2)$             |                       | $(n_T = 4, n_S = 3)$             |                       | $(n_T = 5, n_S = 2)$             |                       | $(n_T = 5, n_S = 3)$             |                       |
|----------------------------------|-----------------------|----------------------------------|-----------------------|----------------------------------|-----------------------|----------------------------------|-----------------------|
| 3 projected crossings            |                       | 8 projected crossings            |                       | 5 projected crossings            |                       | 10 projected crossings           |                       |
| Topology                         | # possible braid rep. | Topology                         | # possible braid rep. | Topology                         | # possible braid rep. | Topology                         | # possible braid rep. |
| <b>C<sub>3</sub> - symmetric</b> |                       | <b>C<sub>4</sub> - symmetric</b> |                       | <b>C<sub>5</sub> - symmetric</b> |                       | <b>C<sub>5</sub> - symmetric</b> |                       |
| 3 <sub>1</sub>                   | 2                     | 8 <sub>18</sub>                  | 2                     | 5 <sub>1</sub>                   | 2                     | 10 <sub>123</sub>                | 2                     |
| <b>Non-symmetric</b>             |                       | <b>C<sub>2</sub> - symmetric</b> |                       | <b>Non-symmetric</b>             |                       | <b>Non-symmetric</b>             |                       |
| 0 <sub>1</sub>                   | 6                     | 3 <sub>1</sub>                   | 8                     | 0 <sub>1</sub>                   | 20                    | 0 <sub>1</sub>                   | 330                   |
|                                  |                       | 4 <sub>1</sub>                   | 4                     | 3 <sub>1</sub>                   | 10                    | 3 <sub>1</sub>                   | 200                   |
|                                  |                       | <b>Non-symmetric</b>             |                       |                                  |                       | 4 <sub>1</sub>                   | 60                    |
|                                  |                       | 0 <sub>1</sub>                   | 88                    |                                  |                       | 5 <sub>1</sub>                   | 60                    |
|                                  |                       | 3 <sub>1</sub>                   | 64                    |                                  |                       | 5 <sub>2</sub>                   | 60                    |
|                                  |                       | 5 <sub>1</sub>                   | 16                    |                                  |                       | 6 <sub>2</sub>                   | 80                    |
|                                  |                       | 5 <sub>2</sub>                   | 32                    |                                  |                       | 6 <sub>3</sub>                   | 20                    |
|                                  |                       | 6 <sub>3</sub>                   | 16                    |                                  |                       | 8 <sub>9</sub>                   | 20                    |
|                                  |                       | 8 <sub>20</sub>                  | 16                    |                                  |                       | 8 <sub>17</sub>                  | 20                    |
|                                  |                       | 3 <sub>1</sub> #3 <sub>1</sub>   | 8                     |                                  |                       | 8 <sub>19</sub>                  | 20                    |
|                                  |                       |                                  |                       |                                  |                       | 8 <sub>20</sub>                  | 20                    |
|                                  |                       |                                  |                       |                                  |                       | 8 <sub>21</sub>                  | 60                    |
|                                  |                       |                                  |                       |                                  |                       | 10 <sub>141</sub>                | 20                    |
|                                  |                       |                                  |                       |                                  |                       | 10 <sub>155</sub>                | 10                    |
|                                  |                       |                                  |                       |                                  |                       | 3 <sub>1</sub> #3 <sub>1</sub>   | 40                    |

**Supplementary Figure 8:** Symmetric and non-symmetric knots for the following  $(n_T, n_S)$  pairs:  $(3, 2)$ ,  $(4, 3)$ ,  $(5, 2)$ ,  $(5, 3)$ . The number of linear braid patterns associated to a given knot type is shown in the second column.

$$(n_T = 5, n_S = 4)$$

**15 projected crossings**

| Topology                         | # possible braid rep. |
|----------------------------------|-----------------------|
| <b>C<sub>5</sub> - symmetric</b> |                       |
| 15a <sub>84903</sub>             | 2                     |
| 15n <sub>41185</sub>             | 2                     |
| 15n <sub>166130</sub>            | 4                     |
| <b>Non-symmetric</b>             |                       |
| 0 <sub>1</sub>                   | 2910                  |
| 3 <sub>1</sub>                   | 3130                  |
| 4 <sub>1</sub>                   | 370                   |
| 5 <sub>1</sub>                   | 1480                  |
| 5 <sub>2</sub>                   | 2360                  |
| 6 <sub>1</sub>                   | 100                   |
| 6 <sub>2</sub>                   | 140                   |
| 6 <sub>3</sub>                   | 1200                  |
| 7 <sub>1</sub>                   | 200                   |
| 7 <sub>2</sub>                   | 440                   |
| 7 <sub>3</sub>                   | 520                   |
| 7 <sub>4</sub>                   | 420                   |
| 7 <sub>5</sub>                   | 500                   |
| 7 <sub>6</sub>                   | 280                   |
| 7 <sub>7</sub>                   | 20                    |
| 8 <sub>7</sub>                   | 380                   |
| 8 <sub>8</sub>                   | 660                   |
| 8 <sub>10</sub>                  | 680                   |
| 8 <sub>13</sub>                  | 320                   |
| 8 <sub>15</sub>                  | 180                   |
| 8 <sub>16</sub>                  | 140                   |
| 8 <sub>18</sub>                  | 80                    |
| 8 <sub>19</sub>                  | 310                   |
| 8 <sub>20</sub>                  | 1460                  |
| 8 <sub>21</sub>                  | 50                    |
| 9 <sub>28</sub>                  | 60                    |
| 9 <sub>31</sub>                  | 140                   |
| 9 <sub>33</sub>                  | 40                    |
| 9 <sub>42</sub>                  | 20                    |
| 9 <sub>43</sub>                  | 40                    |
| 9 <sub>44</sub>                  | 120                   |
| 9 <sub>45</sub>                  | 160                   |
| 9 <sub>46</sub>                  | 10                    |

|                                      |     |
|--------------------------------------|-----|
| 9 <sub>48</sub>                      | 90  |
| 9 <sub>49</sub>                      | 100 |
| 10 <sub>112</sub>                    | 80  |
| 10 <sub>114</sub>                    | 40  |
| 10 <sub>122</sub>                    | 60  |
| 10 <sub>124</sub>                    | 60  |
| 10 <sub>125</sub>                    | 280 |
| 10 <sub>126</sub>                    | 240 |
| 10 <sub>128</sub>                    | 120 |
| 10 <sub>129</sub>                    | 160 |
| 10 <sub>130</sub>                    | 280 |
| 10 <sub>132</sub>                    | 360 |
| 10 <sub>134</sub>                    | 120 |
| 10 <sub>135</sub>                    | 520 |
| 10 <sub>139</sub>                    | 50  |
| 10 <sub>140</sub>                    | 140 |
| 10 <sub>142</sub>                    | 60  |
| 10 <sub>143</sub>                    | 180 |
| 10 <sub>145</sub>                    | 80  |
| 10 <sub>146</sub>                    | 10  |
| 10 <sub>148</sub>                    | 320 |
| 10 <sub>151</sub>                    | 440 |
| 10 <sub>153</sub>                    | 520 |
| 10 <sub>156</sub>                    | 40  |
| 10 <sub>157</sub>                    | 20  |
| 10 <sub>159</sub>                    | 40  |
| 10 <sub>160</sub>                    | 40  |
| 10 <sub>161</sub> =10 <sub>162</sub> | 140 |
| 10 <sub>164</sub>                    | 40  |
| 10 <sub>165</sub>                    | 80  |
| 11a <sub>171</sub>                   | 40  |
| 11n <sub>12</sub>                    | 40  |
| 11n <sub>23</sub>                    | 80  |
| 11n <sub>24</sub>                    | 160 |
| 11n <sub>39</sub>                    | 60  |
| 11n <sub>41</sub>                    | 40  |
| 11n <sub>46</sub>                    | 80  |
| 11n <sub>50</sub>                    | 20  |
| 11n <sub>54</sub>                    | 160 |
| 11n <sub>56</sub>                    | 40  |
| 11n <sub>61</sub>                    | 120 |

|                    |     |
|--------------------|-----|
| 11n <sub>65</sub>  | 80  |
| 11n <sub>71</sub>  | 40  |
| 11n <sub>78</sub>  | 20  |
| 11n <sub>82</sub>  | 40  |
| 11n <sub>94</sub>  | 120 |
| 11n <sub>95</sub>  | 40  |
| 11n <sub>96</sub>  | 200 |
| 11n <sub>98</sub>  | 40  |
| 11n <sub>106</sub> | 180 |
| 11n <sub>107</sub> | 20  |
| 11n <sub>118</sub> | 20  |
| 11n <sub>132</sub> | 40  |
| 11n <sub>133</sub> | 20  |
| 11n <sub>145</sub> | 160 |
| 11n <sub>146</sub> | 40  |
| 11n <sub>147</sub> | 40  |
| 11n <sub>148</sub> | 60  |
| 11n <sub>173</sub> | 20  |
| 11n <sub>178</sub> | 20  |
| 11n <sub>179</sub> | 20  |
| 11n <sub>183</sub> | 40  |
| 11n <sub>184</sub> | 20  |
| 12n <sub>121</sub> | 60  |
| 12n <sub>242</sub> | 20  |
| 12n <sub>253</sub> | 40  |
| 12n <sub>309</sub> | 140 |
| 12n <sub>318</sub> | 160 |
| 12n <sub>323</sub> | 200 |
| 12n <sub>328</sub> | 40  |
| 12n <sub>371</sub> | 140 |
| 12n <sub>385</sub> | 80  |
| 12n <sub>425</sub> | 60  |
| 12n <sub>426</sub> | 20  |
| 12n <sub>439</sub> | 100 |
| 12n <sub>443</sub> | 80  |
| 12n <sub>451</sub> | 80  |
| 12n <sub>488</sub> | 100 |
| 12n <sub>548</sub> | 40  |
| 12n <sub>591</sub> | 40  |
| 12n <sub>646</sub> | 40  |

|         |     |
|---------|-----|
| 12n702  | 80  |
| 12n725  | 10  |
| 12n730  | 40  |
| 12n749  | 60  |
| 12n811  | 20  |
| 12n829  | 20  |
| 12n835  | 40  |
| 12n868  | 10  |
| 13n225  | 40  |
| 13n288  | 80  |
| 13n501  | 60  |
| 13n519  | 20  |
| 13n584  | 40  |
| 13n586  | 20  |
| 13n592  | 120 |
| 13n601  | 40  |
| 13n603  | 40  |
| 13n606  | 120 |
| 13n608  | 80  |
| 13n1192 | 20  |
| 13n1644 | 40  |
| 13n1692 | 80  |
| 13n1716 | 40  |
| 13n1718 | 40  |
| 13n1719 | 80  |
| 13n1724 | 80  |
| 13n1727 | 40  |
| 13n1734 | 20  |
| 13n1735 | 40  |
| 13n1739 | 40  |
| 13n1931 | 120 |
| 13n1945 | 40  |
| 13n1957 | 20  |
| 13n2303 | 40  |
| 13n2436 | 40  |
| 13n2442 | 40  |
| 13n2491 | 40  |
| 13n2787 | 120 |
| 13n3023 | 40  |
| 13n3351 | 20  |

|          |    |
|----------|----|
| 13n3393  | 80 |
| 13n3582  | 40 |
| 13n3611  | 40 |
| 13n3956  | 40 |
| 13n3958  | 40 |
| 13n3969  | 40 |
| 13n3973  | 40 |
| 13n3978  | 20 |
| 13n3979  | 40 |
| 13n3982  | 40 |
| 13n3998  | 40 |
| 13n4003  | 40 |
| 13n4035  | 60 |
| 13n4051  | 10 |
| 13n4079  | 60 |
| 13n4080  | 60 |
| 13n4634  | 20 |
| 13n5018  | 10 |
| 14n6174  | 10 |
| 14n21472 | 20 |
| 14n22172 | 20 |
| 14n22583 | 20 |
| 14n23344 | 20 |
| 15n40180 | 20 |
| 15n40184 | 40 |
| 15n40185 | 20 |
| 15n41127 | 20 |
| 15n41189 | 20 |
| 15n41193 | 60 |
| 15n41223 | 20 |
| 15n41235 | 40 |
| 15n43517 | 30 |
| 15n45460 | 10 |
| 15n46935 | 40 |
| 15n46936 | 20 |
| 15n47800 | 40 |
| 15n48957 | 20 |
| 15n49035 | 40 |
| 15n51709 | 20 |
| 15n52941 | 10 |

|           |     |
|-----------|-----|
| 15n52944  | 20  |
| 15n53947  | 20  |
| 15n53948  | 20  |
| 15n56026  | 20  |
| 15n59004  | 40  |
| 15n59005  | 20  |
| 15n59007  | 20  |
| 15n71113  | 20  |
| 15n107628 | 40  |
| 15n124826 | 40  |
| 15n125031 | 40  |
| 15n125991 | 20  |
| 15n126002 | 20  |
| 15n126008 | 20  |
| 15n126010 | 40  |
| 15n126011 | 20  |
| 15n126024 | 10  |
| 15n127000 | 20  |
| 15n127094 | 10  |
| 15n127330 | 10  |
| 15n127609 | 20  |
| 15n127610 | 20  |
| 15n127630 | 40  |
| 15n127654 | 40  |
| 15n163844 | 20  |
| 15n163860 | 20  |
| 15n166131 | 10  |
| 15n166806 | 10  |
| 31#31     | 730 |
| 31#41     | 60  |
| 31#51     | 280 |
| 31#52     | 400 |
| 31#63     | 80  |
| 31#820    | 60  |
| 31#819    | 40  |
| 31#31#31  | 10  |

**Supplementary Figure 9:** Symmetric and non-symmetric knots for the following  $(n_T, n_S)$  pairs:  $(5, 4)$ . The number of linear braid patterns associated to a given knot type is shown in the second column.

$(n_T = 7, n_S = 2)$ **7 projected crossings**

| Topology              | # possible braid rep. |
|-----------------------|-----------------------|
| <b>C7 - symmetric</b> |                       |
| 7 <sub>1</sub>        | 2                     |
| <b>Non-symmetric</b>  |                       |
| 0 <sub>1</sub>        | 70                    |
| 3 <sub>1</sub>        | 42                    |
| 5 <sub>1</sub>        | 14                    |

 $(n_T = 7, n_S = 3)$ **14 projected crossings**

| Topology              | # possible braid rep. |
|-----------------------|-----------------------|
| <b>C7 - symmetric</b> |                       |
| 14a <sub>19470</sub>  | 2                     |
| 14n <sub>21881</sub>  | 2                     |
| <b>Non-symmetric</b>  |                       |
| 0 <sub>1</sub>        | 2688                  |
| 3 <sub>1</sub>        | 2884                  |
| 4 <sub>1</sub>        | 224                   |
| 5 <sub>1</sub>        | 1260                  |
| 5 <sub>2</sub>        | 1400                  |
| 6 <sub>2</sub>        | 168                   |
| 6 <sub>3</sub>        | 896                   |
| 7 <sub>1</sub>        | 280                   |
| 7 <sub>3</sub>        | 280                   |
| 7 <sub>5</sub>        | 560                   |
| 8 <sub>7</sub>        | 336                   |
| 8 <sub>9</sub>        | 28                    |
| 8 <sub>10</sub>       | 336                   |
| 8 <sub>16</sub>       | 168                   |
| 8 <sub>17</sub>       | 28                    |
| 8 <sub>18</sub>       | 112                   |
| 8 <sub>19</sub>       | 280                   |
| 8 <sub>20</sub>       | 868                   |
| 8 <sub>21</sub>       | 140                   |
| 10 <sub>17</sub>      | 28                    |
| 10 <sub>48</sub>      | 56                    |
| 10 <sub>79</sub>      | 28                    |
| 10 <sub>91</sub>      | 56                    |
| 10 <sub>99</sub>      | 14                    |
| 10 <sub>104</sub>     | 28                    |
| 10 <sub>109</sub>     | 28                    |
| 10 <sub>112</sub>     | 168                   |

|                                      |     |
|--------------------------------------|-----|
| 10 <sub>118</sub>                    | 28  |
| 10 <sub>124</sub>                    | 70  |
| 10 <sub>125</sub>                    | 196 |
| 10 <sub>126</sub>                    | 140 |
| 10 <sub>139</sub>                    | 112 |
| 10 <sub>141</sub>                    | 28  |
| 10 <sub>143</sub>                    | 280 |
| 10 <sub>148</sub>                    | 280 |
| 10 <sub>155</sub>                    | 14  |
| 10 <sub>157</sub>                    | 70  |
| 10 <sub>159</sub>                    | 140 |
| 10 <sub>161</sub> =10 <sub>162</sub> | 168 |
| 12a <sub>819</sub>                   | 28  |
| 12a <sub>1209</sub>                  | 28  |
| 12a <sub>1211</sub>                  | 28  |
| 12n <sub>242</sub>                   | 28  |
| 12n <sub>468</sub>                   | 56  |
| 12n <sub>675</sub>                   | 56  |
| 12n <sub>708</sub>                   | 56  |
| 12n <sub>709</sub>                   | 56  |
| 12n <sub>721</sub>                   | 28  |
| 12n <sub>749</sub>                   | 112 |
| 12n <sub>751</sub>                   | 28  |
| 12n <sub>829</sub>                   | 140 |
| 14n <sub>21882</sub>                 | 28  |
| 14n <sub>24169</sub>                 | 28  |
| 14n <sub>27039</sub>                 | 28  |
| 14n <sub>27120</sub>                 | 14  |
| 3 <sub>1</sub> #3 <sub>1</sub>       | 588 |
| 3 <sub>1</sub> #5 <sub>1</sub>       | 168 |
| 5 <sub>1</sub> #5 <sub>1</sub>       | 14  |

**Supplementary Figure 10:** Symmetric and non-symmetric knots for the following  $(n_T, n_S)$  pairs:  $(7, 2)$ ,  $(7, 3)$ . The number of linear braid patterns associated to a given knot type is shown in the second column.

$$(n_T = 8, n_S = 3)$$

16 projected crossings

| Topology                         | # possible braid rep. |
|----------------------------------|-----------------------|
| <b>C<sub>8</sub> - symmetric</b> |                       |
| 16a379778                        | 2                     |
| 16n783154                        | 2                     |
| <b>C<sub>4</sub> - symmetric</b> |                       |
| 8 <sub>18</sub>                  | 4                     |
| 8 <sub>19</sub>                  | 8                     |
| <b>C<sub>2</sub> - symmetric</b> |                       |
| 3 <sub>1</sub>                   | 48                    |
| 4 <sub>1</sub>                   | 40                    |
| 8 <sub>5</sub>                   | 48                    |
| 8 <sub>19</sub>                  | 16                    |
| 12n725                           | 72                    |
| 12n750                           | 32                    |
| 12a1229                          | 16                    |
| 12a1288                          | 8                     |
| 16n998580                        | 16                    |
| <b>Non-symmetric</b>             |                       |
| ...                              |                       |

$$(n_T = 9, n_S = 2)$$

9 projected crossings

| Topology                         | # possible braid rep. |
|----------------------------------|-----------------------|
| <b>C<sub>9</sub> - symmetric</b> |                       |
| 9 <sub>1</sub>                   | 2                     |
| <b>C<sub>3</sub> - symmetric</b> |                       |
| 3 <sub>1</sub>                   | 6                     |
| <b>Non-symmetric</b>             |                       |
| 0 <sub>1</sub>                   | 252                   |
| 3 <sub>1</sub>                   | 162                   |
| 5 <sub>1</sub>                   | 72                    |
| 7 <sub>1</sub>                   | 18                    |

$$(n_T = 10, n_S = 3)$$

20 projected crossings

| Topology                          | # possible braid rep. |
|-----------------------------------|-----------------------|
| <b>C<sub>10</sub> - symmetric</b> |                       |
| T(10,3)                           | 2                     |
| putative 20-crossing knot #1      | 2                     |
| <b>C<sub>5</sub> - symmetric</b>  |                       |
| 10 <sub>123</sub>                 | 4                     |
| 10 <sub>124</sub>                 | 8                     |
| <b>C<sub>2</sub> - symmetric</b>  |                       |
| 3 <sub>1</sub>                    | 210                   |
| 8 <sub>5</sub>                    | 80                    |
| 8 <sub>18</sub>                   | 60                    |
| 8 <sub>19</sub>                   | 120                   |
| 12a1210                           | 80                    |
| 12a1229                           | 20                    |
| 12a1288                           | 10                    |
| 12n725                            | 60                    |
| 12n750                            | 60                    |
| 12n888                            | 30                    |
| 16a377123                         | 20                    |
| 16a377444                         | 20                    |
| 16n783154                         | 20                    |
| 16n998580                         | 20                    |
| 16n1003403                        | 60                    |
| putative 20-crossing knot #2      | 20                    |
| putative 20-crossing knot #3      | 10                    |
| <b>Non-symmetric</b>              |                       |
| ...                               |                       |

|                              | Dowker Code of putative 20-crossing knots for $(n_T = 10, n_S = 3)$ |
|------------------------------|---------------------------------------------------------------------|
| putative 20-crossing knot #1 | 14 16 18 20 22 24 26 28 30 32 34 36 38 40 2 4 6 8 10 12             |
| putative 20-crossing knot #2 | 10 -12 14 -18 -38 26 -28 30 -6 -32 -34 -36 40 -2 4 16 -20 -22 -8 24 |
| putative 20-crossing knot #3 | 10 14 -16 20 24 28 30 32 -34 6 -36 8 38 40 12 2 -4 -18 -22 26       |

**Supplementary Figure 11:** Symmetric and non-symmetric knots for the the following  $(n_T, n_S)$  pairs:  $(9, 2)$ ,  $(8, 3)$  and  $(10, 3)$ . The number of linear braid patterns associated to a given knot type is shown in the second column. Three knot types with 20 projected crossings are fingerprinted by their Dowker code, which could not be further simplified algebraically with the Knotscape software package.
