# Supplementary material for: Discovering privileged topologies of molecular knots with self-assembling models
Source: PubMed Central journal article supplement (PMC6076300; doi:10.1038/s41467-018-05413-z), 2018-08-03
Supplement: 41467_2018_5413_MOESM2_ESM.pdf [file 41467_2018_5413_MOESM2_ESM.pdf]

## **Description of Additional Supplementary Files**

File Name: Supplementary Dataset 1

Description: Cartesian coordinates for the representative knotted constructs shown in Figures 2 and 3 of the main text.
